# Supplementary material for: Single-cell dissection of the immune response after acute myocardial infarction
Source: bioRxiv or medRxiv preprint supplement (doi:10.1101/2023.05.02.23289370), 2023-08-31

# Immune response after STEMI

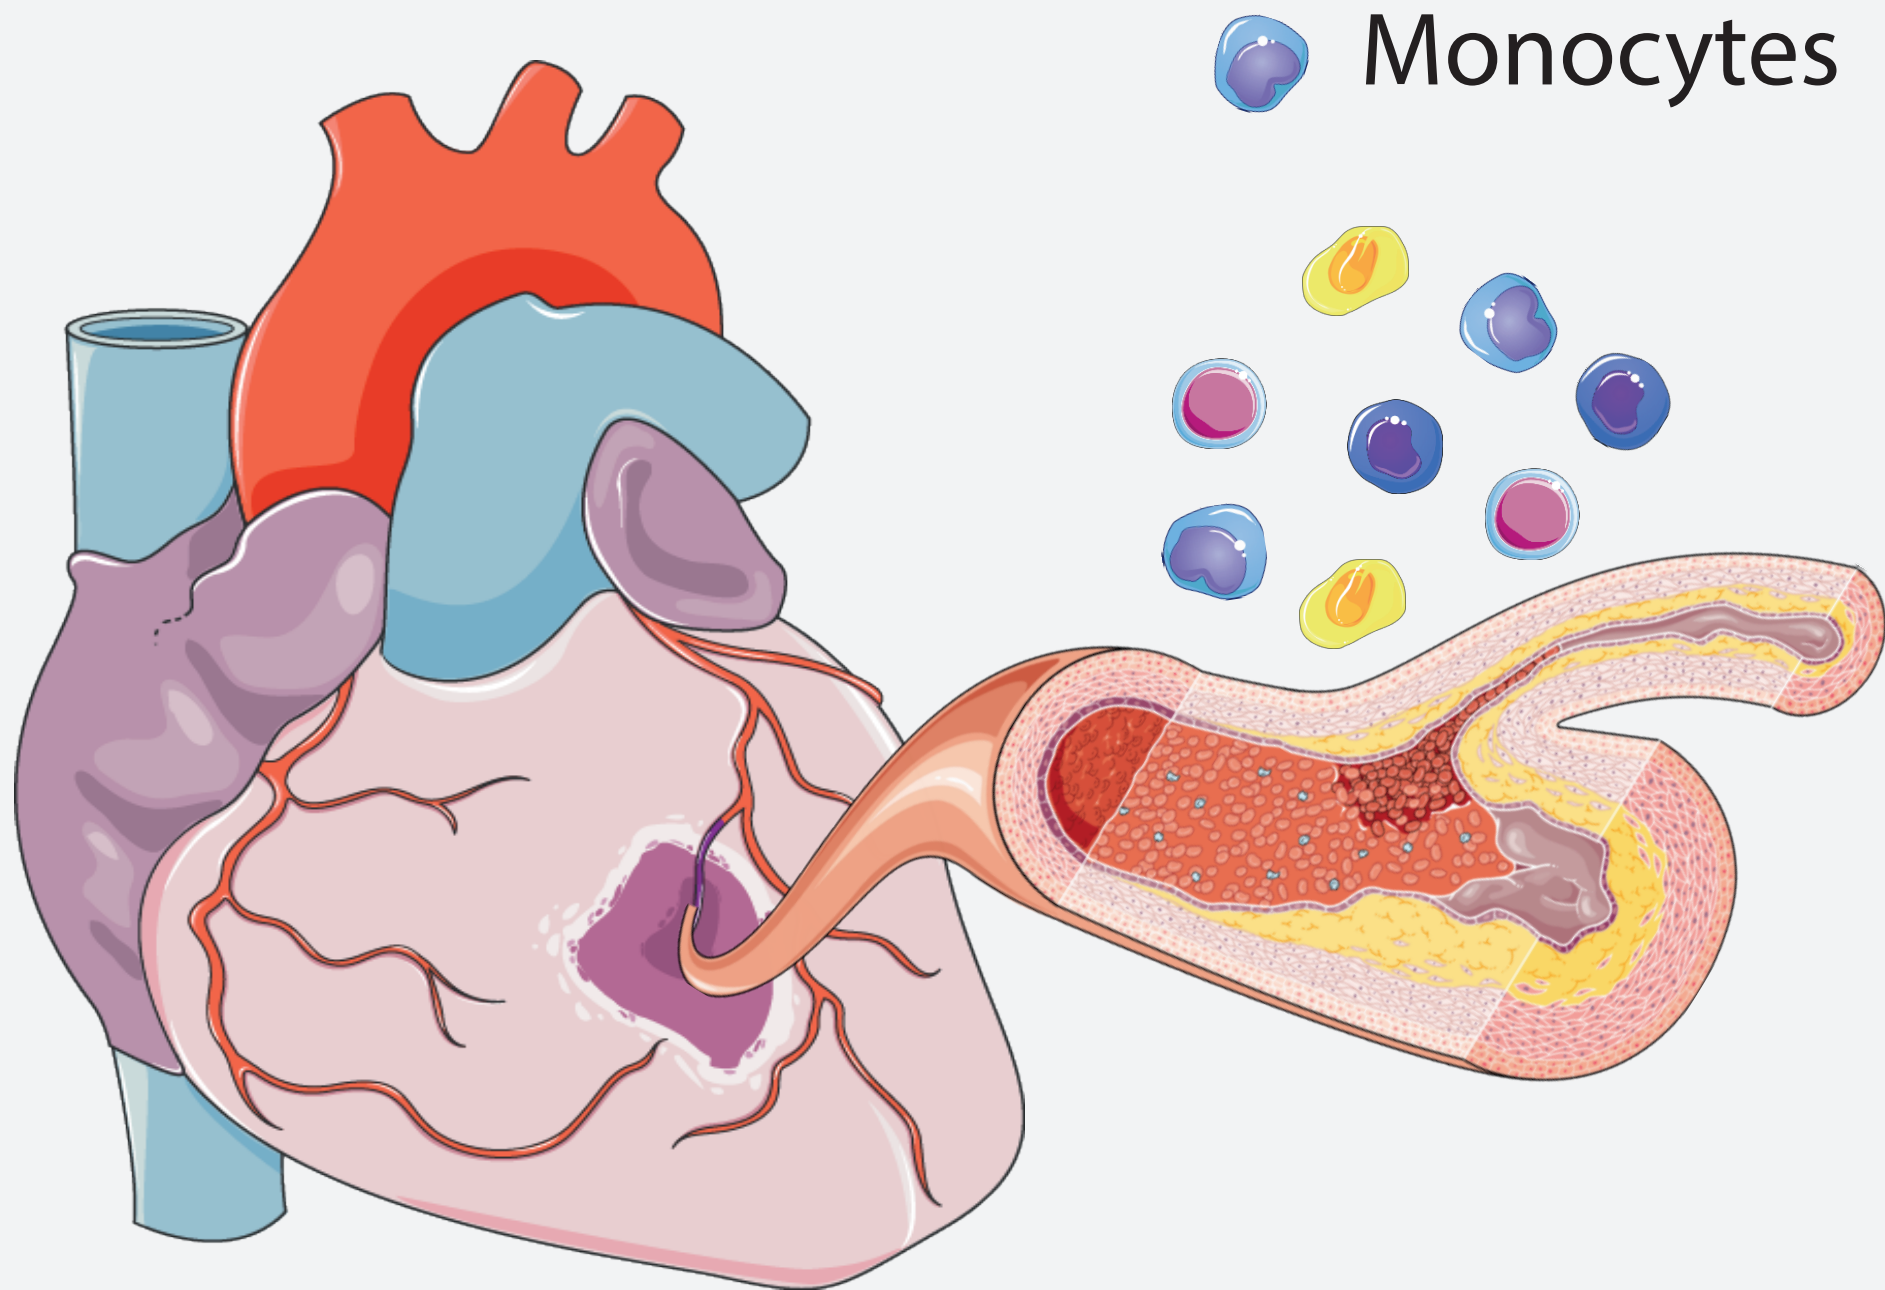

## Study population

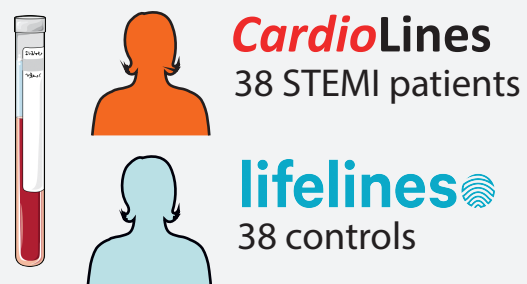

## Differential gene expression

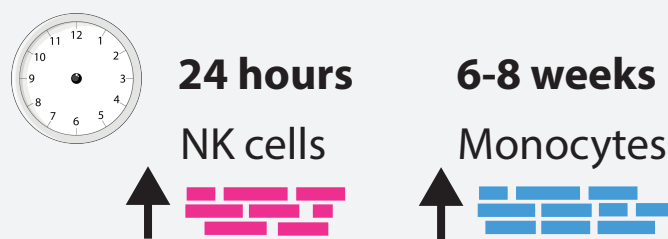

## Pathway analysis

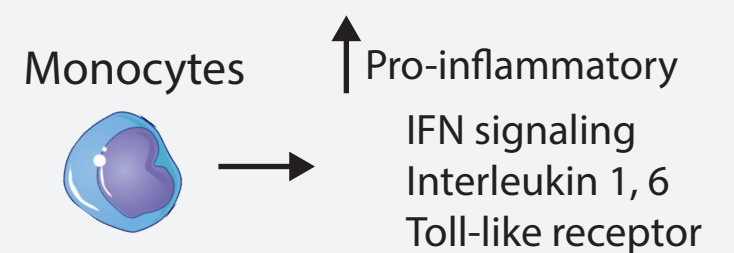

## Cell-to-cell communication

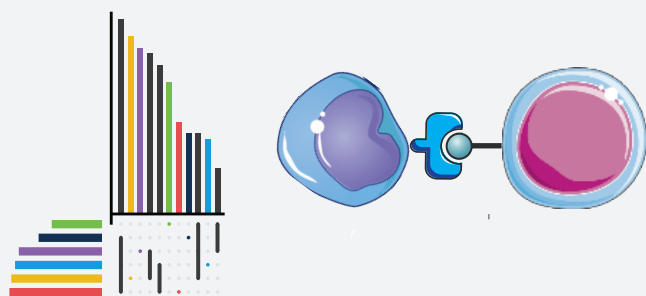

## Protein expression

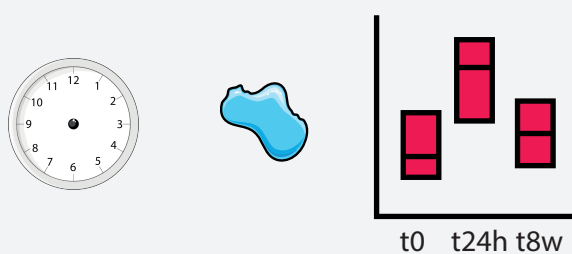

## pQTL analysis

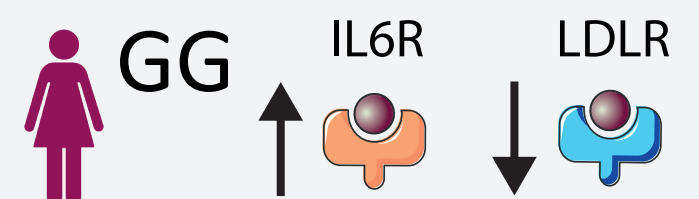

Supplement: Supplementary file [file media-1.pdf]
