# Supplementary material for: Single-cell dissection of the immune response after acute myocardial infarction
Source: bioRxiv or medRxiv preprint supplement (doi:10.1101/2023.05.02.23289370), 2023-08-31

# Proportions of minor cell types in STEMI patients and controls

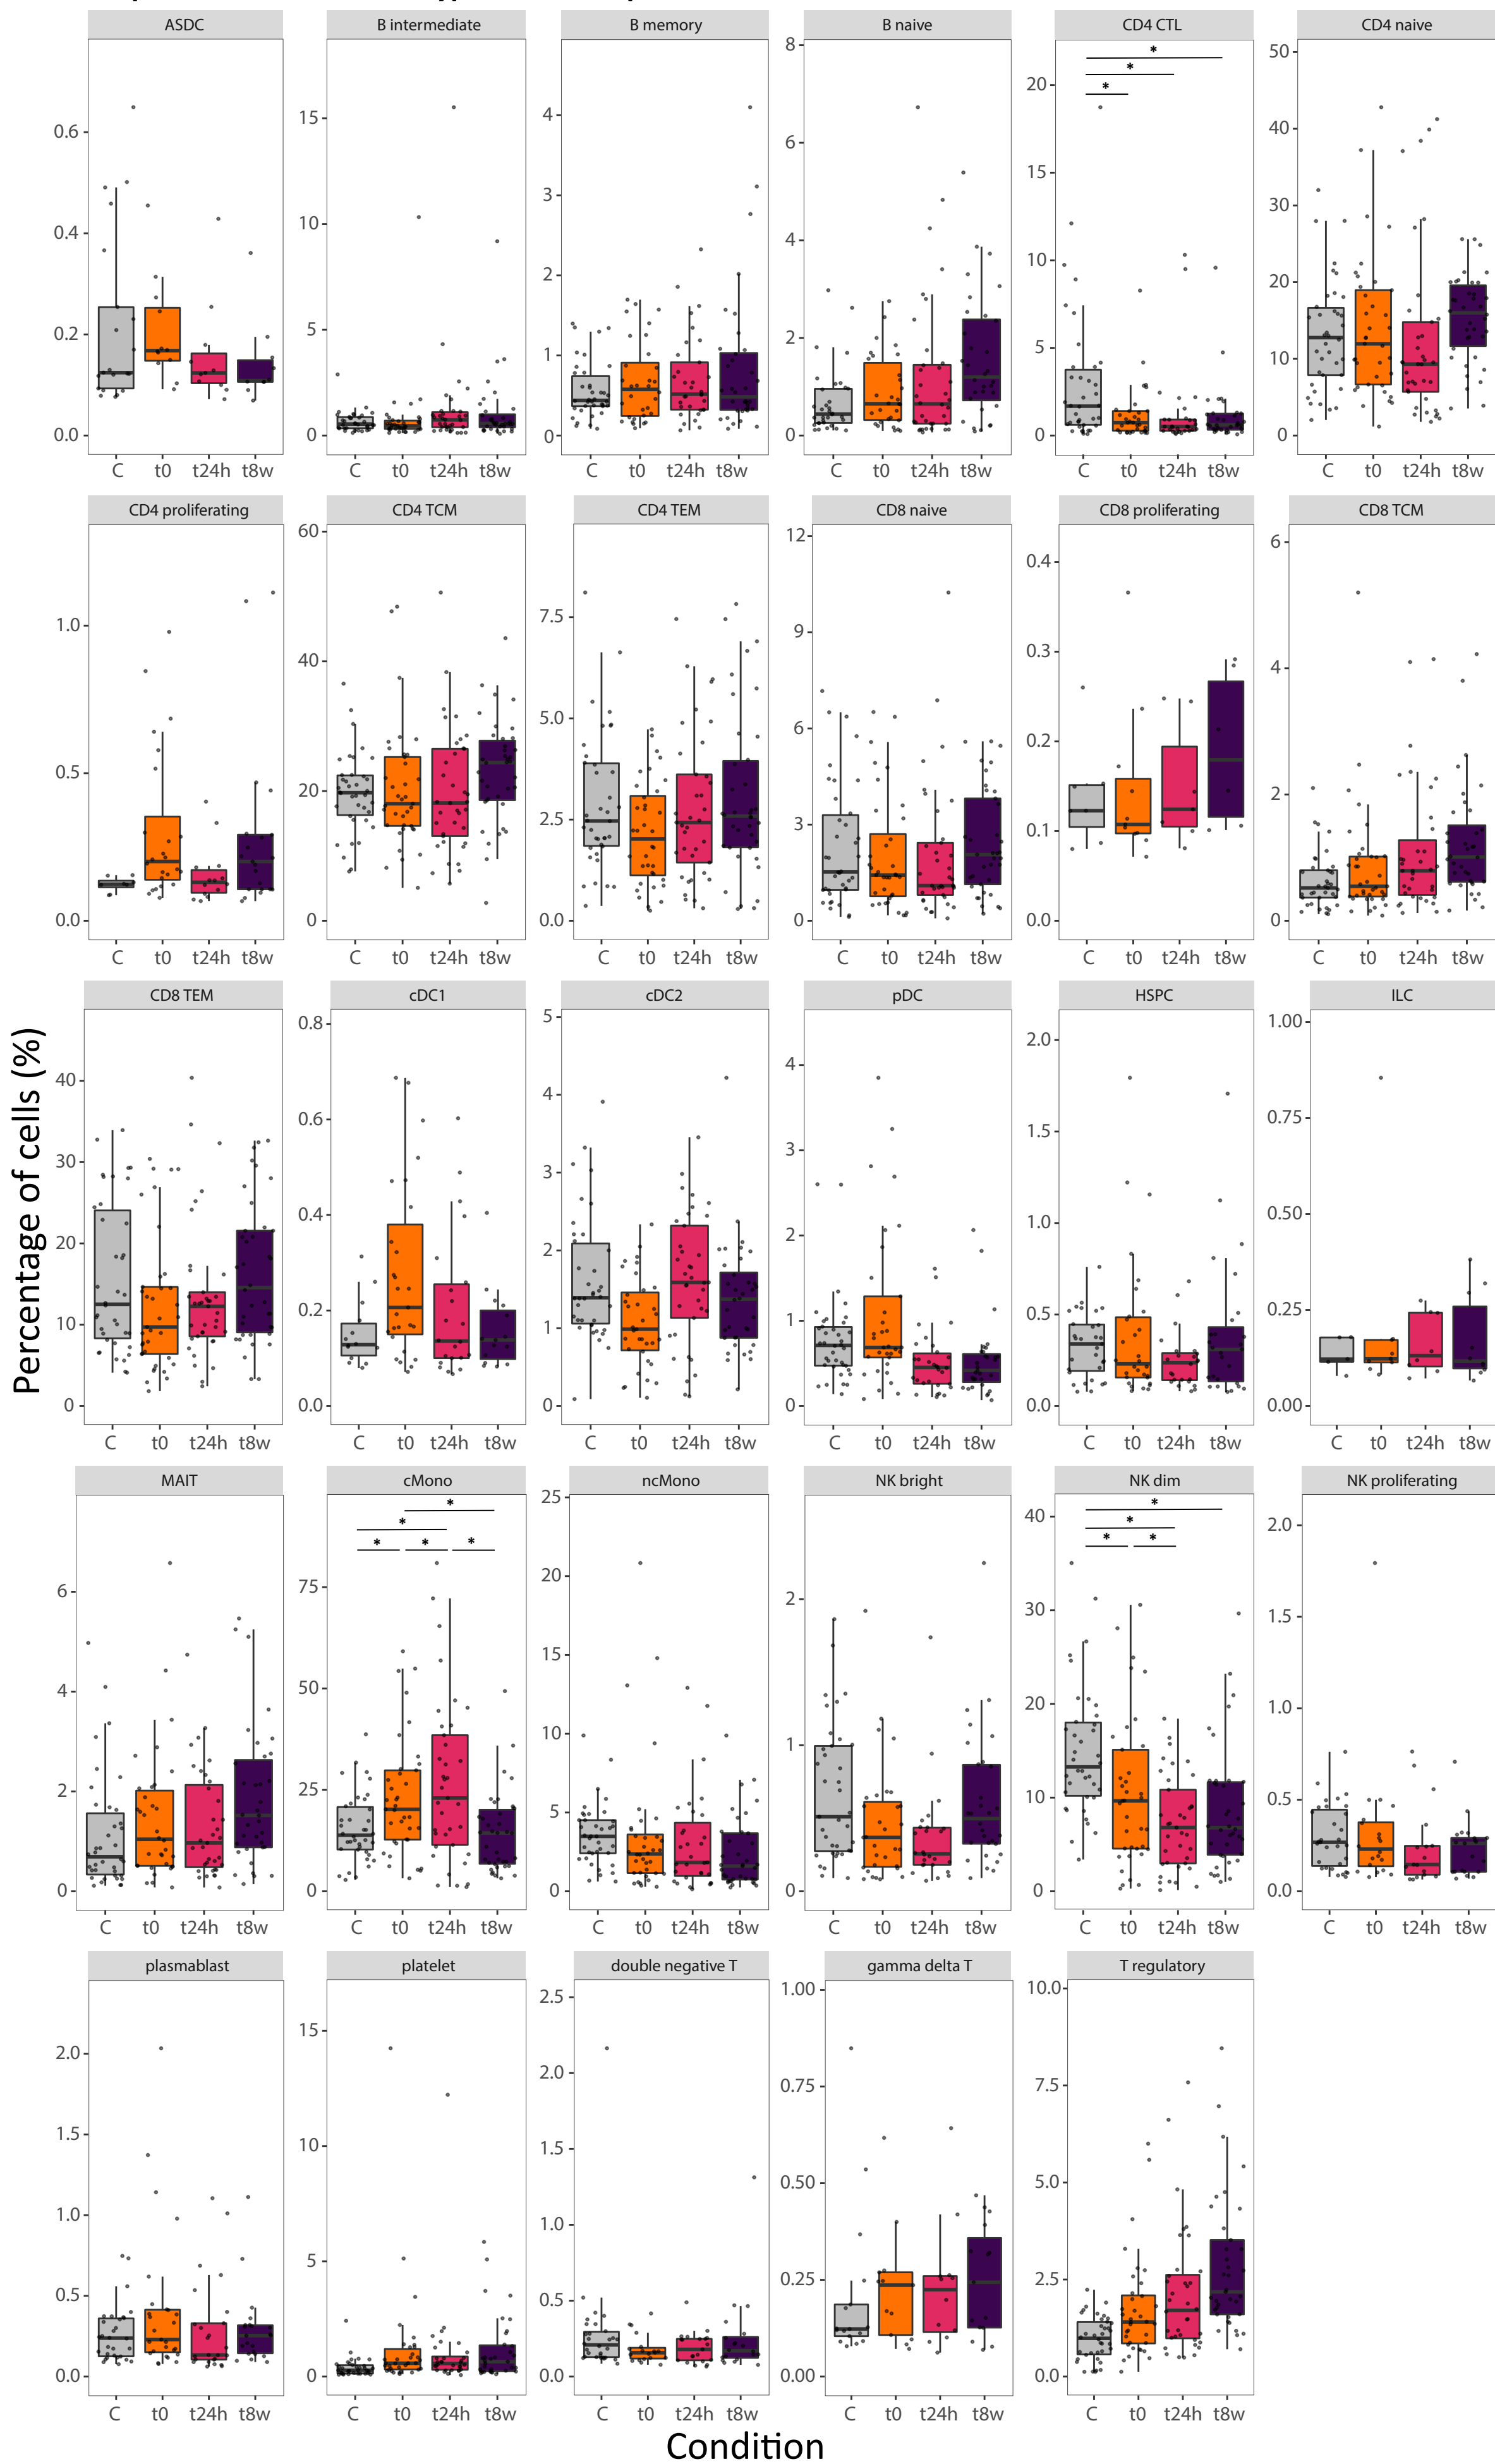

Supplement: Supplementary file [file media-3.pdf]
